# Supplementary material for: Facile and single-step route towards ZnO@C core–shell nanoparticles as an oxygen vacancy induced visible light active photocatalyst using the thermal decomposition of Zn(an)2(NO3)2
Source: Royal Society of Chemistry journal article supplement (doi:10.1039/c6ra14108k), 2016-01-01
Supplement: c6ra14108k1.pdf [file c6ra14108k1.pdf]

## Supporting Information

**Facile and single-step route towards the ZnO@C core-shell nanoparticles as oxygen vacancy induced visible light active photocatalyst using the thermal decomposition of Zn(an)<sub>2</sub>(NO<sub>3</sub>)<sub>2</sub> complex**

Sandesh Y. Sawant and Moo Hwan Cho\*

School of Chemical Engineering, Yeungnam University,

Gyeongsan-si, Gyeongbuk 712-749, South Korea.

E-mail: mhcho@ynu.ac.kr; Fax: +82-53-810-4631; Tel: +82-53-810-2517

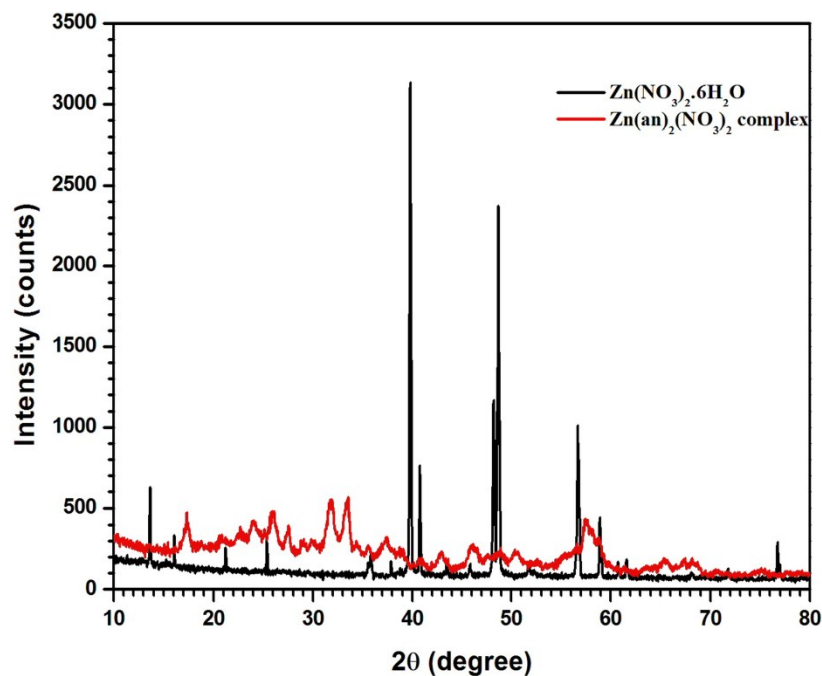

Fig. S1XRD pattern of zinc nitrate hexahydrate and zinc aniline nitrate complex

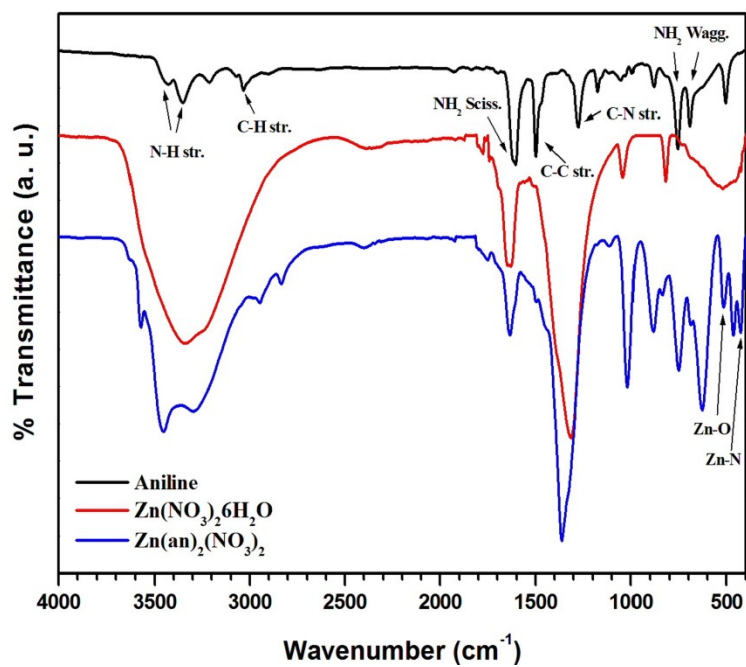

Fig. S2ATR-IR spectra of aniline, zinc nitrate hexahydrate and zinc aniline nitrate complex

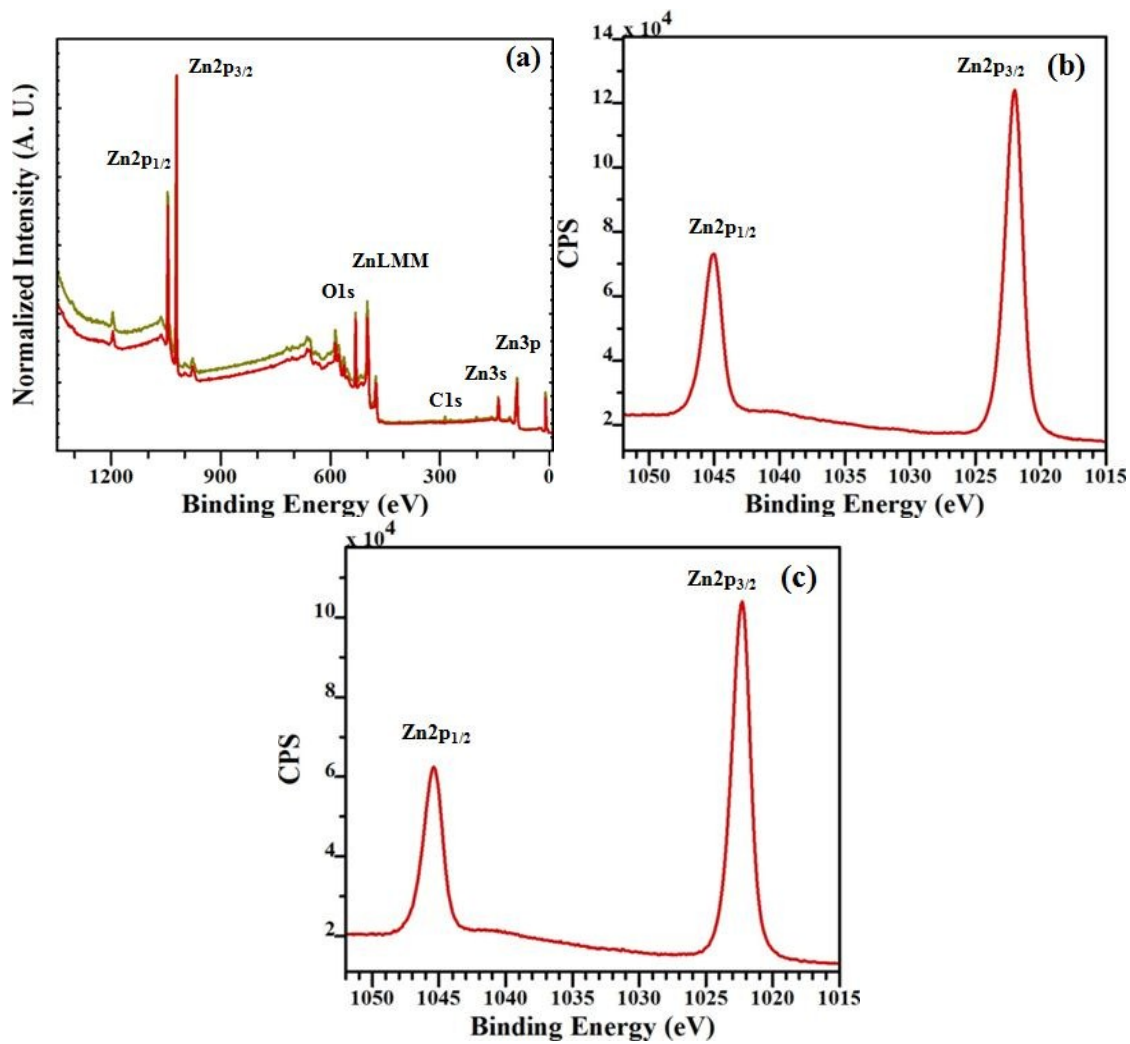

**Fig. S3** (a) XPS survey spectra of ZnO and ZnO@C-2, (b) and (c) high resolution Zn 2p spectra of ZnO and ZnO@C-2, respectively.

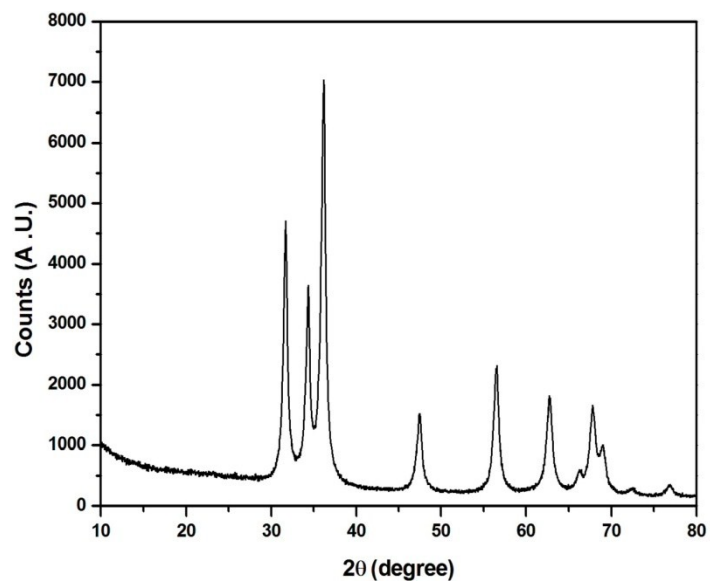

**Fig. S4** XRD pattern of ZnO@C composite obtained from thermal degradation of zinc aniline nitrate complex at 200 °C.

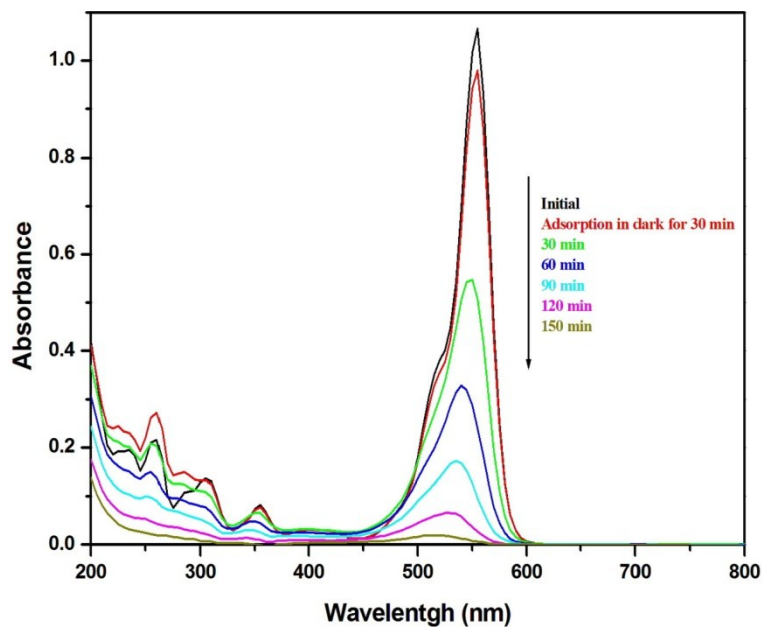

**Fig. S5** Uv-visible absorption spectra of rhodamine B (5 ppm) after photodegradation at different time intervals using ZnO@C-2 catalyst (500 mg/g) under visible light.

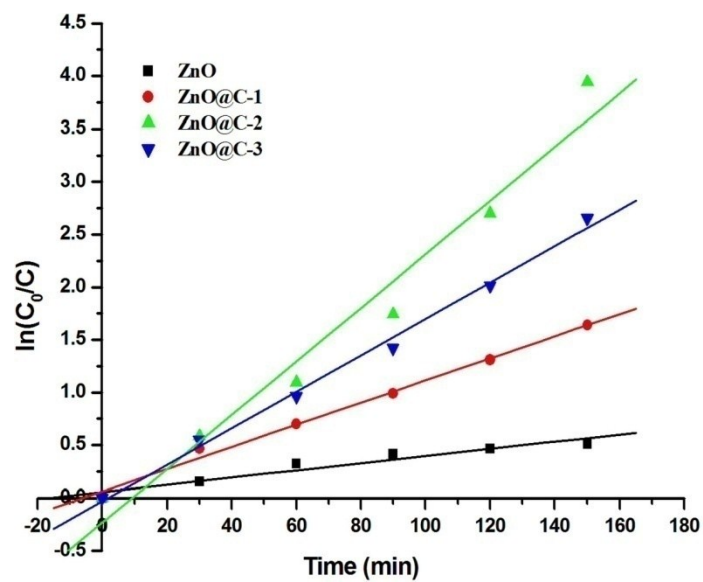

**Fig. S6** Pseudo-first order kinetics plots of RhB degradation using ZnO and ZnO@C based photocatalysts under visible light.
